# Supplementary material
Source: MDPI journal article supplement (https://www.mdpi.com/2071-1050/11/5/1222)
Supplement: s1 [file s1]

## Current food values adapted from Gómez-Cantó et al. (2018)

- 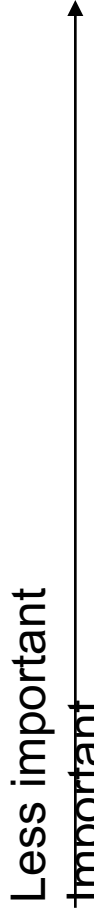
- Taste
  - Safety
  - Price
  - Appearance
  - Nutrition
  - Convenience
  - Tradition
  - Fairness
  - Environmental impact
  - Origin

Definitions adapted from Gómez-Cantó et al. (2018):

Taste: consumption of the food is appealing to the senses

Safety: consumption of food will not cause illness

Price: the price that is paid for the food

Appearance: food looks appealing

Nutrition: amount and type of fat, protein, vitamins, etc.

Naturalness: produced without modern technologies

## Values promoted by the initiatives

- Origin
- Environmental Impact
- Tradition
- Taste
- Nutrition
- Fairness
- Naturalness
- Price
- Convenience
- Appearance

Convenience: ease with which food is cooked and/or consumed

Tradition: preserving traditional consumption patterns

Fairness: all parties involved in the food production of the food benefit equally

Environmental impact: effect of food production on the environment

Origin: where the agricultural commodities were grown
